1

2 **Differential and defective expression of Koala Retrovirus indicate complexity of**  
3 **host and virus evolution**

4

5 R.E.Tarlinton<sup>1,8</sup>, A.R. Legione<sup>6</sup>, N. Sarker<sup>2</sup>, J. Fabijan<sup>3</sup>, J. Meers<sup>2</sup>, L. McMichael<sup>2</sup>,  
6 G.Simmons<sup>2</sup>, H.Owen<sup>2</sup>, J.M.Seddon<sup>2</sup>, G. Dick<sup>3</sup>, J.S. Ryder<sup>4</sup>, F. Hemmatzedah<sup>5</sup>, D.J.,  
7 Trott<sup>5</sup>, N. Speight<sup>5</sup>, N. Holmes<sup>7</sup>, M. Loose<sup>7</sup>, R.D.Emes<sup>1</sup>

8

- 9 1. School of Veterinary Medicine and Science, University of Nottingham, UK  
10 2. School of Veterinary Science, The University of Queensland, Australia  
11 3. Longleat Safari Park, United Kingdom, Durrel Wildlife Conservation Trust, United  
12 Kingdom  
13 4. Garston Veterinary Group, Somerset, United Kingdom  
14 5. School of Animal and Veterinary Sciences, University of Adelaide, Australia  
15 6. Faculty of Veterinary and Agricultural Sciences, University of Melbourne, Australia  
16 7. School of Life Sciences, University of Nottingham, UK  
17 8. Corresponding Author: [Rachael.tarlinton@nottingham.ac.uk](mailto:Rachael.tarlinton@nottingham.ac.uk)

18

19 Word Count Abstract:

20 Word Count Manuscript:

21

## 22 **Abstract**

23 Koala retrovirus (KoRV) is unique amongst endogenous (inherited) retroviruses in that  
24 its incorporation to the host genome is still active, providing an opportunity to study  
25 what drives this fundamental process in vertebrate genome evolution. Animals in the  
26 southern part of the natural range of koalas were previously thought to be either virus  
27 free or to have only exogenous variants of KoRV with low rates of KoRV induced disease.  
28 In contrast, animals in the northern part of their range universally have both  
29 endogenous and exogenous KoRV with very high rates of KoRV induced disease such as  
30 lymphoma. This paper uses a combination of sequencing technologies, Illumina RNA  
31 sequencing of "southern" (south Australian) and "northern" (SE QLD) koalas and CRISPR  
32 enrichment and nanopore sequencing of DNA of "southern" (South Australian and  
33 Victorian animals) to retrieve full length loci and integration sites of KoRV variants. We  
34 demonstrate that koalas that tested negative to the KoRV *pol* gene qPCR, used to detect  
35 replication competent KoRV, are not in fact KoRV free but harbour defective, presumably  
36 endogenous, "ReKoRV" variants that are not fixed between animals. This indicates that  
37 these populations have historically been exposed to KoRV and raises questions as to  
38 whether these variants have arisen by chance or whether they provide a protective  
39 effect from the infectious forms of KoRV. This latter explanation would offer the  
40 intriguing prospect of being able to monitor and selectively breed for disease resistance  
41 to protect the wild koala population from KoRV induced disease.

42

## 43 **Introduction**

44

45 Koalas (*Phascolarctos cinereus*) are an iconic marsupial species listed as  
46 vulnerable on the IUCN 'red list' of threatened species <sup>1</sup>. While a large part of their  
47 ongoing population decline is due to habitat loss, two major disease threats, chlamydial  
48 infection and Koala Retrovirus (KoRV), are additionally limiting population viability <sup>2</sup>.  
49 These infections are particularly prevalent in the northern regions of Australia, namely

50 the states of Queensland and New South Wales, and less so in the south (South  
51 Australia, Victoria) <sup>3,4</sup>.

52 Following European settlement, large koala populations across Australia declined  
53 significantly due to hunting in the 1890's to 1920's, with southern populations nearing  
54 extinction. During this time, small refuge populations were established on offshore  
55 Victorian islands and these koalas have been used subsequently to restock most of their  
56 former southern range. This southern population is genetically distinct from the northern  
57 animals <sup>5</sup> with a more limited genetic diversity<sup>6</sup>. The history of translocations in southern  
58 animals is complex but the original founder populations of French and Phillip Islands are  
59 thought to have been the source for most mainland Victorian animals with potential  
60 remnant populations of greater diversity in the Strzelecki ranges <sup>5</sup>. The mainland Mount  
61 Lofty Ranges koala population in South Australia originates from koalas from both the  
62 Kangaroo Island population, populated by koalas from French Island <sup>7</sup> as well as koalas  
63 from Queensland and New South Wales <sup>5,8</sup>.

64 Endogenous retroviruses (ERVs) are those that have become incorporated into  
65 their host's genome. They are ubiquitous in vertebrate genomes and in some cases  
66 constitute up to 10% of total genome content <sup>9</sup>. They are usually not functional viruses  
67 due to the accumulation of mutations and deletions but are often expressed at an RNA  
68 level, where they are thought to play a role in genomic regulation <sup>9 10,11</sup>. They are known  
69 in some cases to provide essential functions to their hosts, such as the syncytin genes  
70 responsible for placental fusion in many species <sup>12,13</sup> as well as their role in stem cells,  
71 reproductive tissue and early embryos <sup>14</sup>. However their effects on the host upon initial  
72 entry to the host genome are not clear. KoRV is part of a small group of unusual  
73 "modern" endogenous retroviruses (including Murine leukaemia virus, Feline leukaemia  
74 virus and Jaagsietke sheep retrovirus). These modern ERVs are replication competent  
75 and display considerable overlap with their exogenous infectious counterparts, including  
76 swapping of gene segments <sup>15,16</sup>.

77 KoRV is one of the most recent entrants into any known mammalian genome,  
78 with estimates of integration time somewhere between 200 and 49,000 years ago <sup>17,18</sup>. It

79 is thought to have arisen from a recent species jump as its closest relatives are  
80 endogenous viruses in two subspecies of *Melomys burtoni* (the grassland mosaic tailed  
81 rat) in northern Australia and Indonesia<sup>19,20</sup>, Gibbon ape leukaemia virus (GALV), a  
82 pathogenic exogenous virus that most likely arose as a spill over event from south east  
83 Asian rodents in the late 1960s<sup>21</sup> and Flying fox retrovirus, a very recently described  
84 exogenous virus of black flying foxes (*Pteropus alecto*)<sup>22 23</sup>.

85 KoRV was originally identified during investigations into the high rates of  
86 lymphoid neoplasia (lymphoma and leukaemia) in Queensland koalas<sup>17</sup>. Koalas with  
87 lymphoid neoplasia have significantly higher KoRV viral loads<sup>24 25</sup> and some strains of  
88 KoRV also influence the cytokine response profile of koala lymphocytes<sup>26</sup>. Recent studies  
89 have indicated that somatic insertions of KoRV perturb oncogenes and underlie the very  
90 high rate of cancer in KoRV A positive animals<sup>27</sup>. Multiple studies also indicate that high  
91 KoRV viral loads (in northern populations) or positive PCR status (in southern  
92 populations)<sup>28-32</sup> are linked to clinical chlamydial disease, probably as a factor of  
93 retroviral induced immunosuppression.

94 KoRV has been found in 100% of Queensland and New South Wales koalas but  
95 appears to have a lower prevalence in southern populations<sup>4,28,30,32-34</sup>. The virus displays  
96 a high diversity in proviral copy number and integration sites between individuals and  
97 populations, with southern animals having lower copy numbers in their DNA<sup>24,35 4</sup>.  
98 Somatic insertions are also apparent against a background of endogenous insertions in  
99 northern animals<sup>27</sup>.

100 A number of sequence variants of the *env* gene region, which encodes the surface  
101 unit (SU) of the envelope protein (Env), have also been identified (Figure 1). These vary  
102 between individuals and resemble the viral quasispecies common to infectious  
103 retroviruses, with clades referred to as A to J<sup>34,36</sup>. The originally identified virus is now  
104 known as KoRV A and appears to be present in all individuals that are KoRV-positive  
105<sup>27,28,30,33,37</sup>. Various koala genome sequencing studies indicate that only KoRV A is  
106 endogenised in northern animals with other variants present at lower than one  
107 copy/genome equivalent, indicating that they are not present in all tissues or cells of an

108 animal<sup>27,35,38</sup>. A recent study indicated that there may be one KoRV A locus shared  
109 amongst most (perhaps all) northern animals, which perhaps represents the original  
110 endogenisation event<sup>27</sup>. KoRV A infections in southern animals may represent genuine  
111 exogenous (infectious) virus as these are in many cases also present at less than one  
112 copy per genome equivalent<sup>4</sup>. The non-A variants may also represent genuine  
113 exogenous (infectious) virus in both northern and southern animals, circulating  
114 independently with these present as low copy number/somatic insertions<sup>27,38,39</sup>, not  
115 detected in all animals<sup>29,30,34,40-42</sup> and display a pattern of detection in family groupings  
116 consistent with a maternally transmitted infection<sup>42 40 33 43</sup>. Some caution is necessary in  
117 interpreting this however as phylogenetic analysis of the envelope variants from a  
118 variety of sequencing studies do not clearly indicate chains of transmission<sup>34,36,41</sup> and,  
119 by analogy with infectious retroviruses in other species (for instance FeLV in cats), many  
120 envelope sequence variants may arise from KoRV A within individual infections rather  
121 than transmitting from animal to animal<sup>15</sup> or may be transmitted as a co-infection with  
122 KoRV-A. This is particularly likely for many of the "D" group of variants that do not  
123 appear to be replication competent<sup>34,44,45</sup>.

124         There has been much debate as to whether the B/J variant, which displays a  
125 different receptor usage to KoRV A is more pathogenic as these variants have been  
126 epidemiologically linked with clinical disease in some studies but not others<sup>46 47 29 33</sup>.  
127 This may however be a factor of the sensitivity of diagnostic methods used as at least  
128 one study has demonstrated that koalas with higher viral loads display greater  
129 quasispecies diversity and are more likely to test positive on PCR based tests for non-A  
130 variants<sup>36</sup>. That study also demonstrated that viral diversity is much higher in RNA  
131 (actively replicating virus) than DNA (copies inserted either endogenously or from initial  
132 infection) from the same animal.

133         Genomic sequencing studies have also demonstrated that there are a number of  
134 other older endogenous retroviruses and transposable elements within the koala genome  
135<sup>6,38,48,49</sup>. One of these, Phascolarctid endogenous retroelement (PhER), is found  
136 frequently in northern koala genomes in recombination with KoRV. These recombinant

137 KoRV "RecKoRV" structures typically consist of the 5' LTR and 5' end of the KoRV *gag*  
138 gene, approximately 5 Kb of the 3' end of PhER and its LTR, followed by the 3' end of the  
139 KoRV *env* gene and KoRV 3'LTR<sup>38,49</sup> (Figure 1). There appear to be multiple variants of  
140 these that arise from very similar recombinations at particular points in the KoRV/PhER  
141 genomes. They are not shared between all animals but do display some geographical  
142 clustering in loci that are shared between individuals and may be absent in some  
143 populations<sup>49</sup>. Variants of KoRV A with large indels or "Solo LTRs" (where the middle  
144 part of the virus is spliced out during cellular DNA replication) are also seen<sup>38</sup>.

145 This study reports the presence of RecKoRV variants in Southern animals that do  
146 not carry KoRV A. These variants appear to be a different genetic lineage to that present  
147 in northern animals and to be present (though not fixed) in all animals tested from  
148 multiple Victorian and South Australian populations, including the founder population on  
149 French Island.

150

## 151 **Methods**

### 152 **Ethics**

153 Ethical approval for this study was granted by the University of Queensland  
154 Animal Ethics Committee, permit number ANFRA/SVS/461/12, the Queensland  
155 Government Department of Environment and Heritage Protection permit number  
156 WISP11989112, the University of Adelaide Animal Ethics Committee permit number S-  
157 2013-198 and the South Australian Government Department of Environment, Water and  
158 Natural Resources Scientific Research Permit Y26054, the University of Nottingham  
159 School of Veterinary Medicine and Science Clinical Ethics Research Panel, and  
160 Department of Environment and Primary Industries (Victoria, Australia) (Research Permit  
161 10006924).

### 162 **Samples for DNA sequencing**

163 DNA sequencing was performed on samples from five southern koalas (Table 1 B).  
164 Spleen samples from three wild Victorian animals were collected at necropsy as outlined  
165 in<sup>30</sup>. Liver samples were collected from one 3 year old female South Australian koala

166 housed in a zoological park in the UK that had been recently imported from an Australian  
167 captive population derived from the Mt Lofty ranges and Kangaroo Island population in  
168 SA. This animal died of the kidney disease oxalate nephrosis with samples of liver  
169 collected at post mortem and stored at -20°C until DNA extraction and sequencing.  
170 Lymph node samples were collected from one wild Mt Lofty (SA) that died as a result of  
171 dog attack as described in <sup>25</sup>.

172

### 173 **Samples for RNA seq**

174 Samples were collected from wild-rescued koalas euthanised for clinical reasons  
175 and submitted for post-mortem examinations from South East Queensland (Greater  
176 Brisbane) (n=10) and South Australia (Mount Lofty Ranges) (n=19). Age was  
177 determined by dentition and the amount of wear on the upper premolar <sup>50</sup> (Table 1 A).  
178 Full details of these animals are presented in <sup>6</sup>. Submandibular lymph nodes were  
179 collected within 2-6 hours of death into RNALater® and stored at -80°C. Where possible,  
180 blood was collected into EDTA prior to euthanasia (BD vacutainer) with whole blood and  
181 plasma added to RNA later as per previous studies <sup>51</sup> kept at -80°C. Of the ten koalas  
182 from South East Queensland (QLD), six were male and four female and all were adults,  
183 with a tooth wear class (TWC) 4 or 5. Nineteen koalas were sampled from the Mount  
184 Lofty Ranges, South Australia (SA); seven female and 12 male. Six were juvenile (TWC 1  
185 or 2) and 13 were adults (TWC 3 or 4).

### 186 **Nanopore Sequenced animals**

#### 187 **DNA extraction for nanopore sequencing**

188 Genomic DNA was extracted from frozen liver/spleen tissue that had been ground into a  
189 fine powder under liquid nitrogen. The Qiagen Genomic Tip (100/G) kit (Qiagen; 10243)  
190 was used to extract DNA from 100 mg of tissue powder. DNA was quantified using the  
191 Qubit Fluorometer (Thermo Fisher Scientific) and the Qubit dsDNA BR Assay Kit (Thermo  
192 Fisher Scientific; Q32853) and the molecular weight was assessed using the Agilent  
193 TapeStation 4200 and the Agilent Genomic DNA ScreenTape Assay (Agilent; 5067-5365  
194 and 5067-5366). A sequencing library was prepared using the Genomic DNA by Ligation

195 Kit (Oxford Nanopore Technologies; SQK-LSK109) and run on a PromethION flow cell  
196 (Oxford Nanopore Technologies; FLO-PRO002) for 72 hours on a PromethION beta  
197 sequencer (Oxford Nanopore Technologies).

198

### 199 **Nanopore Sequencing for KoRV insertions**

200 Cas9-mediated PCR-free enrichment was performed to identify individual KoRV insertion  
201 sites. Genomic DNA was also extracted as described above or was extracted from spleen  
202 tissue, that had been stored in RNeasy (ThermoFisher) at -80°C, using the Qiagen  
203 PureGene DNA extraction Kit (Qiagen; 158445).

204

205 Genomic DNA was dephosphorylated to inhibit binding of Oxford Nanopore sequencing  
206 adapters to non-specific DNA fragments. Six custom Alt-R CRISPR-Cas9 crRNA  
207 (Integrated DNA Technologies) were used to form Cas9 ribonucleoprotein complexes  
208 (RNPs) that would facilitate strand-specific cleavage at target sites within KoRV. Cleaved  
209 ends were simultaneously dA-tailed to facilitate directional ligation of sequencing  
210 adapters and enrich for reads initiating at these crRNA cleavage sites. Lyophilized crRNA  
211 were reconstituted to 100 uM TE (pH7.5) and pooled in equimolar amounts. Cas9-  
212 mediated enrichment, sequencing library preparation and sequencing were then  
213 performed according Oxford Nanopore Technologies Cas-mediated PCR-free enrichment  
214 protocol (Version: ENR\_9044\_v1\_xxxx\_08Aug18); and each library was run on a  
215 separate MinION flow cell (Oxford Nanopore Technologies; FLO-MIN106 R9.4.1) on the  
216 GridION X5 Mk1.

### 217 **Nanopore Sequencing of PCR amplicons**

218 PCR amplification was conducted using the primer set KRV R2 forward  
219 (ATCTACCCGGAGACGGACAG) and reverse (GCCGGTACCTATACCTGCTG)<sup>25</sup> to amplify an  
220 approximately 6kb fragment of the KoRV genome from extracted genomic DNA from the  
221 SA koala K15-012. A sequencing library was prepared using the Rapid Sequencing Kit  
222 (Oxford Nanopore Technologies; SQK-RAD004) and run on a MinION flow cell (Oxford



223 Nanopore Technologies; FLO-MIN106D) for 36 hours on a MinION sequencer (Oxford  
224 Nanopore Technologies).

225

## 226 **Sequence Assembly and Mapping**

227 Nanopore sequences were basecalled using guppy and reads that passed the default  
228 read filtering metrics were obtained. Reads for each koala were mapped to the KoRV  
229 retrovirus reference genome (Genbank Accession number: AF151794) using minimap2<sup>52</sup>  
230 and samtools<sup>53</sup>. Read mapping was visualised using Geneious Prime software  
231 (Biomatters, New Zealand) and reads were truncated to retain regions upstream and  
232 downstream of the KoRV genome. These truncated reads were then mapped against the  
233 koala reference genome assembly (Genbank Accession number: GCA\_002099425.1)  
234 using minimap2 with no secondary hits allowed. The mapped reads were visualised in  
235 Geneious Prime to identify the directionality of the insert, whether the insert potentially  
236 interrupted coding regions of the koala genome, and identify upstream genes that could  
237 be influenced by insertion. Additionally, reads were mapped to a sequence of PhER<sup>54</sup>.

238

239 All reads mapping to KoRV for each koala were assembled using flye<sup>55</sup> in order to obtain  
240 a consensus insert assembly. Additionally, reads that mapped to individual contigs of the  
241 koala reference genome, representing individual insert sites, were extracted and  
242 assembly was also attempted using flye.

## 243 **Animals for RNAseq**

### 244 **RNA preparation for RNAseq**

245 Total RNA was extracted from lymph nodes using an RNeasy Mini kit with on column  
246 DNAase1 digestion (Qiagen). RNA quantity and quality were assessed via anXpose  
247 spectrophotometer (Bioke) and Agilent 2100 Bioanalyzer. mRNA was prepared for  
248 sequencing using the Illumina TruSeq stranded mRNA library prep kit and 100 base pair,  
249 paired end sequencing was performed on an Illumina HiSeq. Details of the koalas,  
250 sample quality and read quantity are provided in Supplementary data 1.

### 251 **RNA and DNA extraction for qPCR/PCR (SA and QLD animals)**

252 DNA was extracted from 100 µL of EDTA blood using a DNeasy blood and tissue kit  
253 (Qiagen). Where available RNA was extracted from plasma Using the QIAmp Viral RNA  
254 mini kit with on-column Qiagen RNase free DNase digestion. The extracted RNA and DNA  
255 was stored at -80°C for RT-PCR (RNA) and PCR (DNA) as required.

#### 256 **KoRV qPCR**

257 The presence of KoRV provirus for individual gene segments was assessed by  
258 qPCR for the KoRV A *pol* gene (the standard KoRV diagnostic assay)<sup>31</sup> on DNA extracted  
259 from whole blood as reported in <sup>25</sup>.

#### 260 **KoRV genome coverage**

261 To reduce mis-mapping due to the abundance of highly repetitive long terminal  
262 repeat sequences, the adapter-trimmed fastq files were first mapped using Hisat2 <sup>56</sup> to  
263 the isolated Long Terminal Repeat (LTR) region of the koala KoRV type sequence  
264 (accession AF151794). LTR depleted reads were then mapped to representative  
265 sequences of KoRV A and RecKoRV derived from the koala reference genome (KoRV45  
266 and RecKoRV6 Supplementary data 2 and 3) <sup>56</sup>. Per-base coverage was determined from  
267 bam files for each isolate using samtools version 1.3.1 depth (with parameters -aa -q  
268 10 -d 20000).

#### 269 **KoRV envelope variant gene expression**

270 To quantitate the expression of KoRV envelope variants, LTR depleted reads for  
271 individual koalas were pseudoaligned to the *gag*, *pol* and *env* genes of KoRVA  
272 (accessions AAF15097.1\_1, AAF15097.1\_2 and AAF15097.1\_3 respectively) and the first  
273 575 nucleotides of the envelope variants of the non-A KoRV variants B-I (accessions  
274 AB822553.1, AB828005.1, AB828004.1, KX588043.1, KX587994.1, KX587961.1,  
275 KX588036.1 and KX588021.1 respectively) and the 3' overlap of PhER/KoRV in RecKoRV  
276 using Kallisto <sup>57</sup>. These nucleotides correspond to the hypervariable region of the *env*  
277 gene that is used in KoRV envelope variant classification.

278

#### 279 **Data Availability**

280 KoRV sequence data (as fasta formatted data) are available from adac figshare  
281 [[https://figshare.com/authors/Adac\\_uon\\_Adac\\_uon/566308](https://figshare.com/authors/Adac_uon_Adac_uon/566308)]. Raw RNA sequence reads  
282 available in FASTQ format at ENA with the accession number PRJEB21505. Nanopore  
283 sequence data is available via accession number PRJNA770362.

284

## 285 **Results**

286 RNA from submandibular lymph nodes from 10 QLD and 19 SA animals was  
287 subjected to paired end illumina sequencing (HiSeq 100bp) and was mapped to  
288 representative KoRVA and RecKoRV sequences from the koala reference genome (Figure  
289 3) . Demographic data for individual animals are presented in Supplementary data set 1.

290 When normalised for total mapped read depth, coverage was very similar for  
291 both the SA and QLD groups of koalas across the ends of the KoRV genomes (LTR-*gag*,  
292 and *env*-LTR). However, between positions 1389 and 7124 of the KoRV A sequence the  
293 SA group showed a mean coverage of < 10% of the QLD group suggesting that part of  
294 *gag*, all of *pro-pol* and part of the *env* genes were largely missing in the RNA transcripts,  
295 with six SA koalas not expressing this region at all (Figure 3 A) . The target site of the  
296 standard KoRV *pol* qPCR used in most studies is contained within this missing region <sup>51</sup>.  
297 Data from other publications from this sample cohort indicate that some of SA animals  
298 were KoRV PCR positive for the proviral *pol* gene (and other genes) suggesting that at  
299 least partial proviruses for this region were present but were expressed at levels  
300 undetectable in the transcriptome<sup>25</sup>.

301 The higher number of reads in the *env* and LTR regions of the QLD animals can  
302 be explained by the presence of spliced *env* transcripts in addition to full length genomic  
303 transcripts as has been reported by other groups <sup>54</sup>, although these are not detected as  
304 complete individual transcripts by the mapping methods used in this study.

305 Mapping of the reads to RecKoRV demonstrated relatively even coverage from  
306 the QLD animals, However there was little to no coverage of the 3' portion of the PhER  
307 segment of RecKoRV in the SA animals, indicating that while there are RecKoRV

308 sequences in the SA animals these likely differ in sequence from those in the genome  
309 animal (Figure 3 B)

310 Pseudomapping of the sequence reads to the KoRV A genome (complete *gag*,  
311 *pro-pol* and *env* genes) and type sequences of the hypervariable region of the *env* gene  
312 (base pairs 6000-6575 of KoRV A) of each of the previously identified KoRV envelope  
313 variants (KoRV A to I as per the classification scheme used in Chappell *et.al.* 2016<sup>34</sup>)  
314 demonstrated that while QLD koalas had multiple envelope variants within individuals,  
315 SA animals had far lower KoRV envelope variant diversity. Significantly higher  
316 expression was observed for KoRV A,B,D,E and G variants in QLD compared to SA  
317 samples (unpaired t-test with unequal variance) (Figure 4 and Supplementary data 4). It  
318 was observed that QLD animals were older (mean tooth wear class 4.22 95% CI 3.88-  
319 4.56) than SA (mean tooth wear class 3.05 95% CI 2.58-3.52) and so age may  
320 confound KoRV expression comparisons. When the same test was repeated for samples  
321 from koalas with the same tooth class 4 (7 QLD 8 SA samples), expression of A,B,E and  
322 G variants remained significantly different between locations (Supplementary data 5),  
323 supporting the finding that KoRV *env* expression is significantly higher in the QLD than  
324 the SA populations. Eleven out of nineteen SA animals (58%) had KoRV A. Six of these  
325 koalas had only KoRV A reads (Figure 4 and Table 2). Four animals had reads for KoRV A  
326 and one other variant only (D or E). Two animals had reads for KoRV E but no detectable  
327 reads for any other variant (including KoRV A). Only one SA koala (Z Table 2) had  
328 counts comparable to the QLD cohort with a similar range of variants (A, B, C, D, E, F,  
329 G, I), while the rest had counts that were <10% of the QLD koalas. *Pol* gene counts  
330 were also similarly considerably lower in the SA koalas than the QLD group. Relative  
331 expression as estimated count values for individual animals for each gene region and  
332 KoRV envelope variant are presented in Supplementary data 4.

333

334 Mapping of CRISPR enriched nanopore sequences from koala samples to the KoRV  
335 reference genome identified a clear drop in coverage across the main portion of the  
336 genome. This went from base 450 in the *gag* coding region to base 1134 in the *env*

337 coding region, or bases 1411 - 7040 across the KoRV-A reference genome (Figure 5).  
338 Mapping to a PhER assembly identified improved coverage, but there were still clear  
339 regions of near zero coverage in the mid-region of the reference (Figure 5). Importantly  
340 the three samples that had previously tested negative to KoRV using conventional PCR  
341 targeting the *pol* gene (Koalas 01 03 and 04) both had reads mapping to KoRV, but no  
342 coverage in the region of the PCR targets. Alignment of PhER and KoRV A from the  
343 (northern) reference genome animal and the sequence variants found in the southern  
344 animals is presented in Supplementary data 6. Assembly of reads that mapped to the  
345 koala reference genome generated 17 contigs containing RecKoRV variants (8 from K01-  
346 SA1-CRISPR, 7 from K01-SA1-WG, and 1 each from K03-Vic23 and K04-Vic31). The  
347 general structure of these inserts were similar across the assemblies besides a ~579 bp  
348 gap at the 5' end at the interruption of the KoRV gag gene. Aligning all read sets back to  
349 one of the RecKoRV variants from Koala 01 showed that this insert was present across  
350 all koala samples (Figure 5).

351

352 Mapping of CRISPR enriched nanopore sequences from four koala samples identified  
353 potential KoRV insert locations on 30 koala reference genome contigs (filtering this to  
354 require at least five reads mapping at the same site in at least one koala to constitute an  
355 insertion point). The data from koala 5 could not be mapped in this way as the PCR and  
356 sequencing strategy excluded the insertion sites. A summary of insert sites and read  
357 mapping is available in Table 3. Of the predicted insertion points (Figure 6), eight were  
358 shared between samples, with koala 1 sharing insert sites with koalas 3 (2 contigs) and  
359 4 (1 contig), and koala 3 sharing sites with koala 2 (1 contig) and 4 (4 contigs). No  
360 insertion sites were shared between all koalas

361

362 An outline of interrupted genes, or genes downstream of KoRV insert sites, is presented  
363 in Table 4. Of the 30 insertion sites determined by mapping reads to the koala reference  
364 genome, 10 occurred within annotated genes, typically in predicted introns.

365

366 **Discussion**

367

368           The findings of the current study suggest that KoRV infection involves a more  
369 complex host-viral relationship than previously recognised, particularly in SA and  
370 Victorian koalas. Other studies have shown differences between northern and southern  
371 koala populations in the prevalence of KoRV infection, levels of KoRV proviral and viral  
372 loads and disease burden<sup>25,58</sup>. This study has revealed additional viral factors that  
373 indicate these population differences are more complicated than merely presence or  
374 absence of virus and virus load.

375           The results of this study were unexpected. Instead of these southern animals  
376 having demonstrably no KoRV as expected from a preliminary PCR based KoRV pol  
377 screen it was evident in the RNAseq study that they do in fact have at least partial KoRV  
378 sequences. Long read nanopore based DNA sequencing subsequently demonstrated that  
379 these sequences are a variant of the "RecKoRV" recombinant retroelements  
380 demonstrated in northern animals<sup>49</sup>. These are a recombination between the middle  
381 portion of an older retrotransposon in the koala genome and partial sequences of the 5'  
382 and 3' ends of KoRV (with the structure LTR-partial gag- central portion of PhER, -  
383 partial TM unit of env and LTR). The southern koala sequences are apparently of a  
384 different lineage to those found in the northern animals with the substitution of an  
385 unidentified piece of DNA between the KoRV and PhER sequences that is not present in  
386 the reference genome animal.

387

388           A comparison of differing sequencing methods (whole genome nanopore  
389 sequencing), the CRISPR enrichment and a PCR and nanopore sequencing strategy  
390 demonstrates that the CRISPR method produced greater read coverage and depth to  
391 resequencing the entire genome from the same animal and has the distinct advantage of  
392 being considerably cheaper (c £1000 cw £20,000). The PCR and long read sequencing in  
393 comparison was both challenging to get a PCR that worked and produced a lower read  
394 coverage and poorer homology. These sequences were also shorter than the expected

395 6000 Bp and likely represent mis-priming and amplification of the KoRV sequences in the  
396 PCR. This strategy also does not produce sequence information on the insertion site of  
397 the sequences. The PCR mispriming is not unexpected as the repetitive nature of the  
398 LTRs frequently results in poor PCR amplification from genomic DNA (where there are  
399 multiple copies of these ERVs) with many other studies also failing to amplify full length  
400 KoRV proviruses from koala DNA with PCR<sup>17,40,59</sup>. Partial segment PCRs of the KoRV  
401 genome (LTR-*gag*, *gag*, part of *pol*, *env* in two parts) on DNA extracted from blood  
402 samples from SA (results presented in<sup>25</sup>) demonstrated that many SA animals that test  
403 negative on the standard KoRV qPCR have at least some of the missing KoRV segments  
404 in their DNA. This indicates that there may be low copy number (likely somatic)  
405 infections of KoRV present in addition to these high copy number germline RecKoRV  
406 sequences.

407 Koalas with these RecKoRV variants would have been identified as KoRV negative  
408 in previous studies as the standard tests for the virus are conventional PCR or qPCR  
409 assays targeting the portion of the *pol* gene that is missing in these sequences<sup>4,30,51</sup>.  
410 Other studies using KoRV *pol* PCR tests for proviral loci in DNA have also indicated that  
411 at least some southern animals have this gene but at much lower copy numbers than in  
412 QLD animals<sup>4</sup>. The pattern of deletion for more ancient retroviral loci is one of loss of  
413 the *env* genes with maintenance of the *gag-pol* genes to facilitate spread within individual  
414 cells<sup>60</sup>. The replication defective variants missing their *pro-pol* genes in the current  
415 study indicate that the drivers of retroviral endogenisation in the face of an infectious  
416 virus challenge are very different to the long term ones in well adapted virus/host  
417 systems.

418 These RecKoRV variants are clearly replication defective and are unlikely to have  
419 colonised the genome by themselves. They may have originally arisen by being “carried”  
420 along with replication competent viruses as occurs for other retroviruses such as Rous  
421 Sarcoma Virus<sup>61</sup>. It seems likely that these variants along with infectious KoRV were  
422 present before the southern animals were genetically isolated in the 1920’s and that  
423 infectious KoRV alleles either never integrated into the genome of these animals or were

424 lost due to the genetic bottlenecks in the Southern animals<sup>6</sup>. The presence of the  
425 RecKoRV variants in the Victorian animals, particularly in the animal from the founder  
426 population of French Island indicates that it is likely that all southern animals have  
427 these, calling into question whether genuinely KoRV free animals exist. Examining  
428 further animals in these populations for these variants alongside genomic KoRV A is a  
429 priority. Intriguingly these insertions do not appear to be fixed between animals or  
430 populations with only a few loci shared (and none between all animals). This is  
431 comparable to the KoRV insertion patterns seen in the northern animals<sup>27</sup> and indicates  
432 multiple colonisation events over time. It may indicate ongoing intracellular transposition  
433 as has been hypothesised as the mechanism for the proliferation of defective variants in  
434 older endogenised retroviruses in other species<sup>60</sup>. It is also possible that depth of  
435 coverage in some animals has missed some loci and follow up studies, including a larger  
436 number of animals will be essential to confirm the distribution of these defective loci  
437 across the southern koala population.

438         The host genetic restriction in the SA population may also have resulted in  
439 animals with viral receptor alleles that are unable to bind infectious KoRV, restricting  
440 infectious virus replication and transmission and preventing endogenisation of infectious  
441 KoRV. This situation occurs in several mouse strains resistant to certain murine  
442 leukaemia virus strains<sup>62</sup>, though to date there are no known variations between  
443 southern and northern koalas for the KoRV A and B receptors, Pit1, and THTR1 and our  
444 transcriptomics screen of the two populations did not highlight these genes as varying  
445 between northern and southern animals<sup>6 44,47</sup>. It is also possible that mutations in other  
446 genes important in retroviral replication (such as retroviral restriction factors) differ  
447 between the two populations resulting in restricted replication in the SA animals,  
448 although these were not obvious in our genomic screen<sup>6</sup> and this remains to be  
449 explored.

450         Blockade of infectious retroviruses by defective variants has been reported for  
451 several other mammalian endogenous/exogenous retroviruses. Receptor blockade by  
452 defective Env proteins occurs in Jaagsiekte sheep retrovirus (JSRV)<sup>63</sup>, in part explaining



453 the tissue tropism of the exogenous virus for tissues where the endogenous variants are  
454 not expressed. Endogenous JSRV loci also exert a further block on exogenous viral  
455 replication at the viral assembly stage, where defective Gag proteins from the ERV loci  
456 are packaged along with infectious variants preventing the viral particles from being  
457 packaged and transported correctly for viral release from the cell. Receptor blockade by  
458 endogenous Env proteins has also been reported in Murine Leukaemia virus variants in  
459 mice, along with a Gag mediated block at the pre-integration step of viral replication <sup>64</sup>.

460 In this respect a number of lncRNAs were identified downstream of KoRV inserts  
461 that may play a regulatory function in expression of genes in the reverse orientation of  
462 KoRV insert sites. However the distance between each of these inserts and the  
463 associated genes is notable. One example of this is the XPR1 gene (Xenotropic and  
464 polytropic retrovirus receptor 1) which is a receptor for certain gammaretroviruses, at  
465 which two koalas (Koala 01 and Koala 03) have inserts (K01 – 48 reads; K03 – 47  
466 reads) 500 kb upstream from the lncRNA.

467 While we do not yet know which of these scenarios is responsible for the marked  
468 difference in KoRV profiles between northern and southern animals, they raise the  
469 intriguing possibility that these replication defective transcripts may be interfering in  
470 some way with the full length virus variants completing their replication cycle. Future  
471 work will need to include in vivo studies of the truncated variants identified here and  
472 whether these variants do (and at what stage) blockade infectious virus replication.

473 It is also possible that as the southern animals (at least the ones in this study)  
474 are not born with endogenised KoRV A, they are not immune tolerised to the virus and  
475 are more able to mount an effective immune response to it. This would potentially  
476 explain the variations in antibody profiles against KoRV A evident between northern and  
477 southern animals and the very much lower KoRV induced disease prevalence between  
478 the two populations<sup>25,65,66</sup>.

479 This study does not resolve the issue of which (if any) of the identified KoRV  
480 envelope variants is the transmissible version of the virus. As has been reported in many  
481 other studies<sup>34,40,44,46</sup> our northern animals display considerable variation in their KoRV

482 envelope variants as would be expected for a infectious replicating retrovirus. Our SA  
483 animals (with the exception of one animal), display a much more limited env variant  
484 diversity (where there are detectable reads at all) with animals expressing env genes  
485 limited to variants A, D, and E. Animal Z was the only SA animal with reads other than  
486 these three variants. We have previously reported that SA animals (whether KoRV A  
487 positive or not) display a reduced viral load and diversity compared with their QLD  
488 counterparts<sup>36</sup>. It may be that these KoRV positive animals represent those with  
489 exogenous rather than endogenous KoRV as has been posited several times<sup>67</sup> and are  
490 better able to control virus replication.

491         The discovery of these replication defective KoRV sequences in SA animals has  
492 opened up a number of intriguing implications for both controlling disease in koala  
493 populations and the drivers of retroviral endogenisation in their hosts. The hypothesis  
494 that the replication defective variants may blockade infectious KoRV replication, if  
495 substantiated, opens up the option to use selective breeding to re-introduce this trait  
496 into the KoRV susceptible northern population, though this would need to be done with  
497 caution given the presence of other deleterious genetic mutations such as those  
498 responsible for the high incidence of oxalate nephrosis<sup>68</sup> in southern animals.

499

500

#### 501 Acknowledgements

502         This project was funded by the Queensland Department of the Environment and  
503 Heritage Koala Research Grant Programme 2012. NS was also supported by a Keith  
504 Mackie Lucas travel scholarship from the University of Queensland. Koalas for post  
505 mortem were accessed through the Mogill Wildlife hospital (QLD Department of the  
506 Environment and Heritage Protection) and the Adelaide Koala and Wildlife Hospital,  
507 Plympton, South Australia and Fauna Rescue of South Australia Inc. AL was supported  
508 by the VESKI Victoria Fellowship 2018. Long leat Safari park has also received support  
509 through the non-profit Koala Life foundation for work with South Australian koalas.

510

511 Conflict of Interest Statement

512 The authors declare no conflict of interest

513

514

515

516

517

518

519

520

521

522

523

524

525

526

527 **Figures and Tables**

528

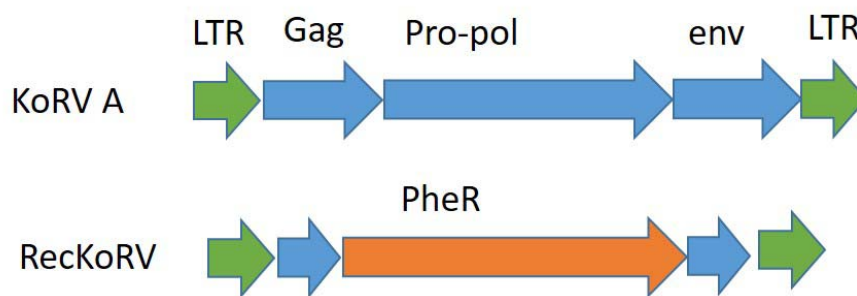

529

530 **Figure 1:** Cartoon of KoRVA and RecKoRV genetic sequence. KoRV LTRs are marked in

531 green, KoRV sequences in blue, PhER sequences in orange.

532

533

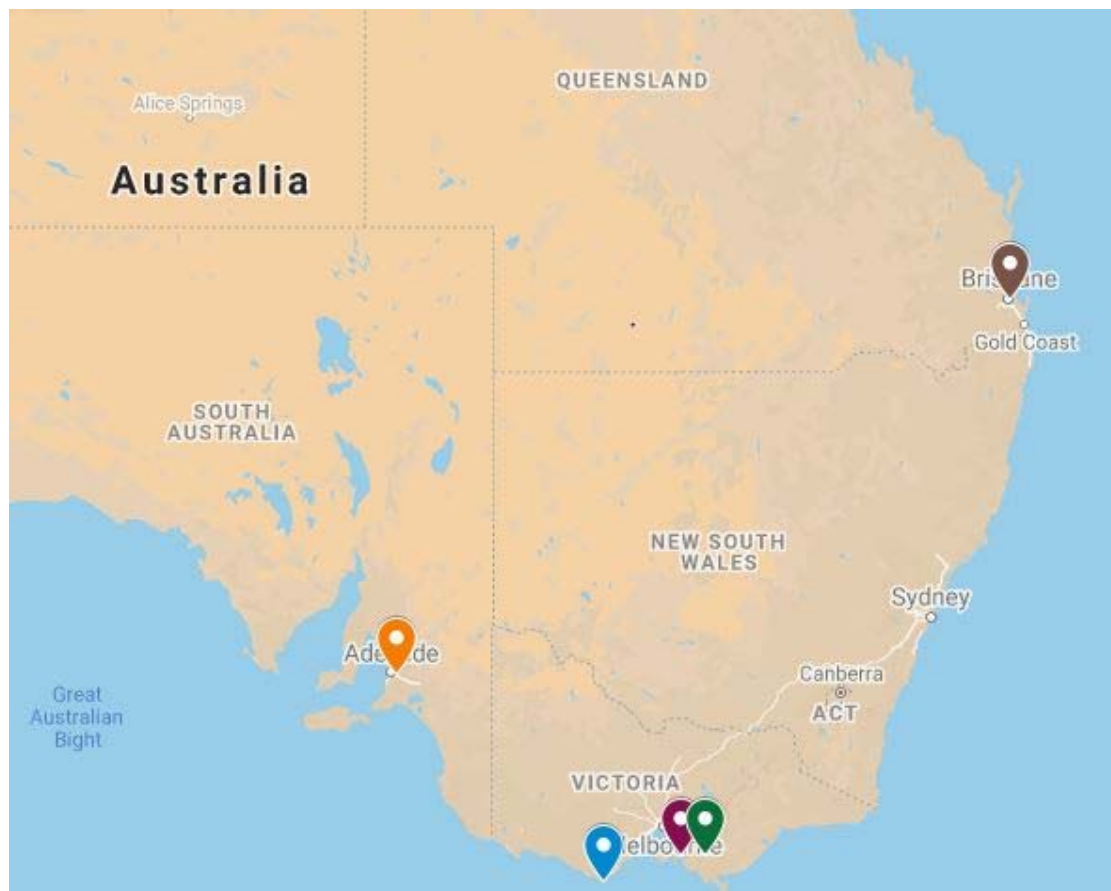

534

535 **Figure 2:** Map of the locations of the animals sampled in this study. Mt Lofty Ranges  
536 orange drop (SA), Cape Otway blue drop, French Island purple drop, Strezlecki ranges  
537 green drop (VIC), SE QLD brown drop (QLD) (map created with Google maps)

538

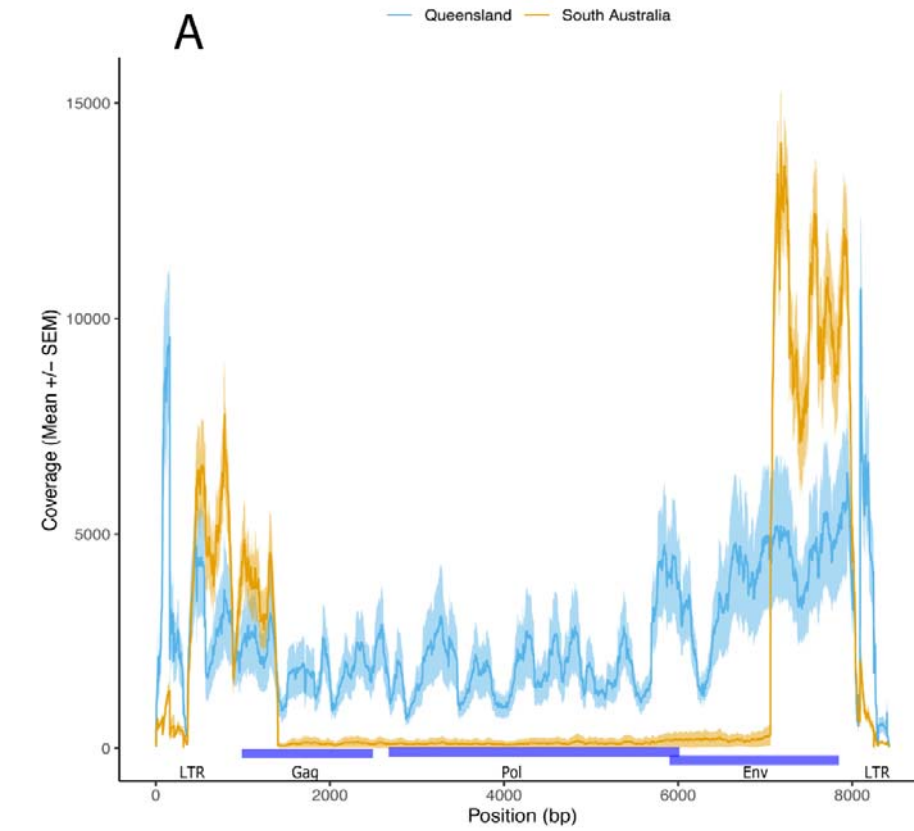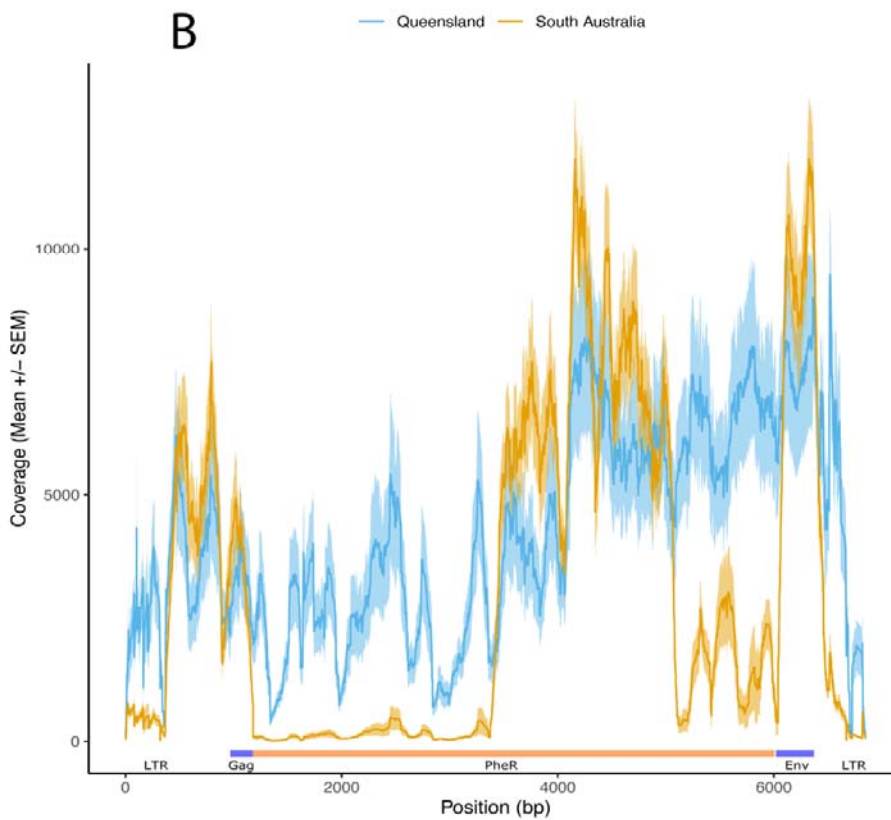

540 **Figure 3: Panel A:** Coverage of reads mapped to a representative sequence of KoRV A  
541 from the koala reference genome . For each group the mean normalised coverage ((per  
542 position coverage/total coverage) x  $1 \times 10^6$ ) is represented by a line and +/- the standard  
543 error is shaded around the mean. QLD samples in blue, SA in orange. KoRV genomic  
544 regions are marked underneath the read maps with blue bars, these regions are: 5' LTR,  
545 gag, pol, env, LTR for KoRV A . **Panel B:** Coverage of reads mapped to a representative  
546 sequence of RecKoRV from the koala reference genome . For each group the mean  
547 normalised coverage ((per position coverage/total coverage) x  $1 \times 10^6$ ) is represented by  
548 a line and +/- the standard error is shaded around the mean. QLD samples in blue, SA in  
549 orange. RecKoRV genomic regions are marked underneath the read maps with blue bars,  
550 these regions are: 5' LTR, gag portion, PhER , env portion, 3' LTR .

551

552

553

554

555

556

557

558

559

560

561

562

563

564

565

566

567

568

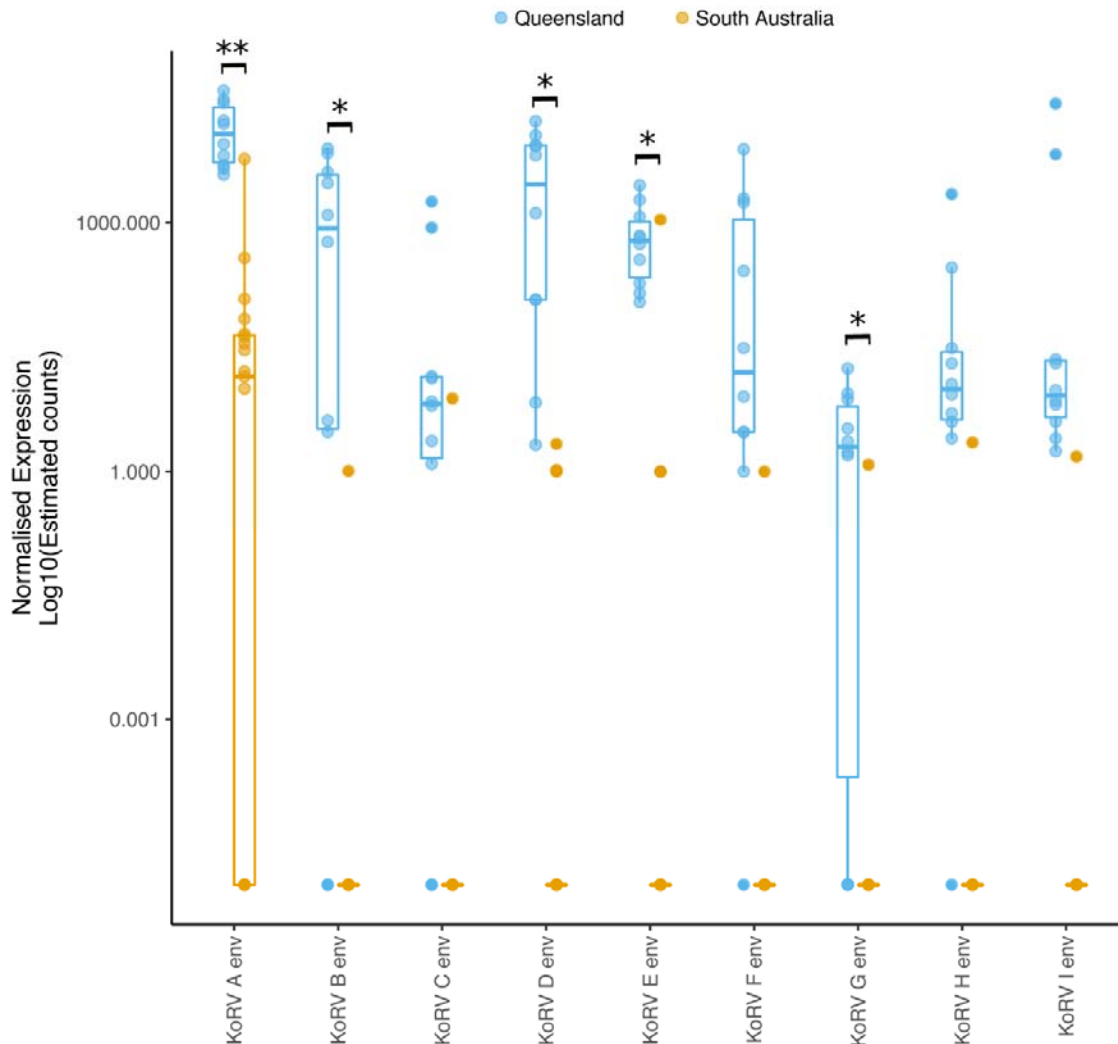

569

570 **Figure 4:** Normalised expression Log<sub>10</sub>(estimated counts) of KoRV A complete *env* gene  
571 and the 575 nucleotides of the hypervariable region of the envelope variants (B-I). Box  
572 and whisker plots show the median and interquartile ranges (box) and  
573 minimum/maximum expression (whiskers) of groups. Data for individual animals within  
574 a group are shown by circles. QLD animals in blue and SA animals in orange. *Env*  
575 variants with significantly different expression between QLD and SA groups marked with  
576 black bars (\*\* = P<0.001, \* = P<0.005 )

577

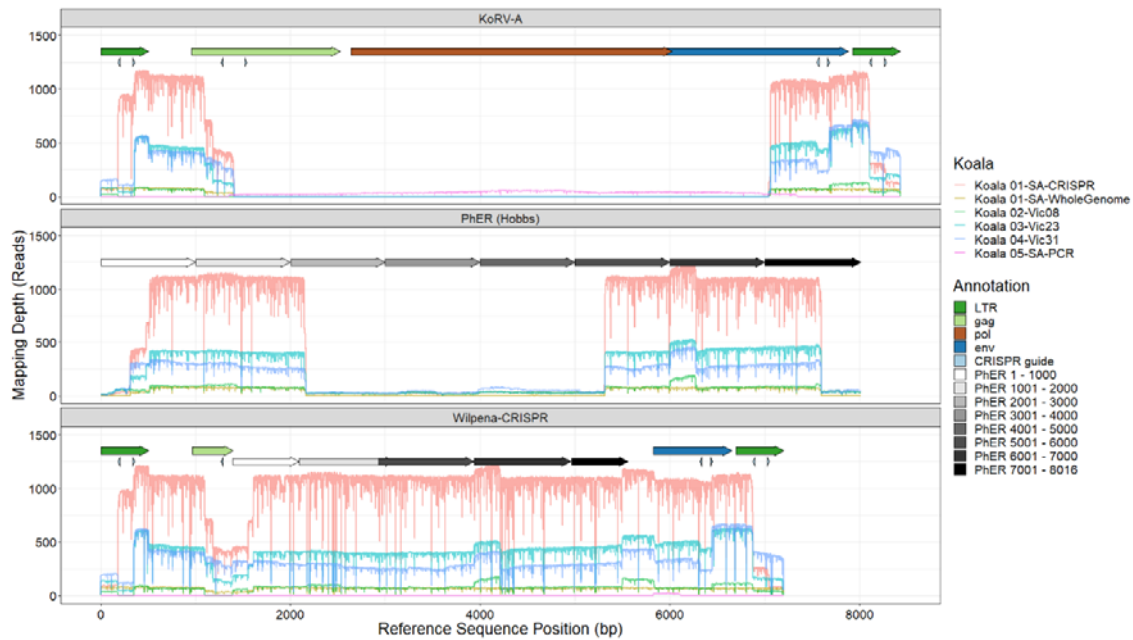

578

579 **Figure 5.** Coverage maps of Nanopore reads mapped to three different reference  
580 sequences (KoRV-A, PhER (Hobbs), Wilpena-CRISPR) using minimap2. Annotation  
581 arrows represent locations of coding domains from KoRV-A (in colour), CRISPR guide  
582 oligos, and genome regions of PhER in 1000 bp increments (greyscale) to highlight the  
583 insertion within the recKoRV assembly Wilpena-CRISPR. Note that the genomes do not  
584 align in the figure and base positions are relative to the reference genome in each plot.  
585





|                        |                |                |
|------------------------|----------------|----------------|
| Neoplasia              | 1 <sup>b</sup> | 0              |
| Oxalate Nephrosis      | 0              | 4              |
| Scoliosis and kyphosis | 0              | 2              |
| Healthy                | 0              | 5              |
| Miscellaneous          | 1 <sup>c</sup> | 3 <sup>d</sup> |
| <b>Total</b>           | <b>10</b>      | <b>19</b>      |

594 <sup>a</sup> some animals had more than one disease syndrome on post mortem  
 595 <sup>b</sup> osteochondroma  
 596 <sup>c</sup> non neoplastic hepatic mass  
 597 <sup>d</sup> one each of unknown, osteomyelitis secondary to trauma and non-chlamydial  
 598 reproductive tract disease  
 599

600 **B: Animals used for nanopore sequencing**

| Koala         | Genetic population      | KoRV A status                                 | Tissue sample | Sequencing strategy            | Cause of death                              |
|---------------|-------------------------|-----------------------------------------------|---------------|--------------------------------|---------------------------------------------|
| K01 (Wilpena) | SA (Mt Lofty ranges)    | negative                                      | Liver         | Whole genome CRISPR enrichment | Oxalate nephrosis                           |
| K02 (08)      | VIC (Cape Otway)        | Positive                                      | Spleen        | CRISPR enrichment              | Euthanased as part of population management |
| K03 (23)      | VIC (French Island)     | Negative                                      | Spleen        | CRISPR enrichment              | Cystic thyroid/thymic mass                  |
| K04 (31)      | VIC (Strezlecki ranges) | Negative                                      | Spleen        | CRISPR enrichment              | Trauma                                      |
| K05 (K15-012) | SA(Mt Lofty ranges)     | Positive only for LTR and TM unit of env gene | lymph node    | Long range PCR and nanopore    | Dog attack                                  |

601

602 **Table 2:** KoRV variant expression of individual animals

| <b>ID</b> | <b>Location<sup>a</sup></b> | <b>Sex</b> | <b>Age<sup>b</sup></b> | <b>Provirus PCR</b> | <b>KoRV variants<sup>c</sup></b> |
|-----------|-----------------------------|------------|------------------------|---------------------|----------------------------------|
| A         | QLD                         | M          | 4                      | +                   | ALL                              |
| B         | QLD                         | M          | 4                      | +                   | ALL                              |
| C         | QLD                         | F          | 4                      | +                   | ALL                              |
| D         | QLD                         | F          | 4                      | +                   | ALL                              |
| E         | QLD                         | F          | >3                     | +                   | A, C, D, E, F, G, H, I           |
| F         | QLD                         | M          | 4                      | +                   | A, D, E, I                       |
| G         | QLD                         | M          | 5                      | +                   | A, B, C, D, E, F, H, I           |
| H         | QLD                         | M          | 4                      | +                   | A, B, D, E, F, G, H, I           |
| I         | QLD                         | F          | 4                      | +                   | ALL                              |
| J         | QLD                         | M          | 5                      | +                   | A, B, C, D, E, F, H, I           |
| K         | SA                          | F          | 4                      | +                   | A                                |
| L         | SA                          | M          | 3                      | +                   | A                                |
| M         | SA                          | M          | 2                      | +                   | N <sup>d</sup>                   |
| N         | SA                          | M          | 4                      | -                   | N                                |
| O         | SA                          | M          | 3                      | +                   | N                                |
| P         | SA                          | F          | 3                      | +                   | N                                |
| Q         | SA                          | M          | 4                      | +                   | A                                |
| R         | SA                          | M          | 2                      | +                   | A                                |
| S         | SA                          | M          | 2                      | +                   | N                                |
| T         | SA                          | M          | 2                      | +                   | A, D                             |
| U         | SA                          | F          | 4                      | +                   | E                                |
| V         | SA                          | M          | 4                      | +                   | E                                |
| W         | SA                          | F          | 4                      | +                   | N                                |
| X         | SA                          | F          | 3                      | -                   | A, D                             |
| Y         | SA                          | F          | 4                      | -                   | A                                |
| Z         | SA                          | M          | 3                      | +                   | A, B, C, D, E, F, G, I           |

|    |    |   |   |   |      |
|----|----|---|---|---|------|
| A1 | SA | F | 1 | + | A, E |
| A2 | SA | M | 2 | - | A, D |
| A3 | SA | M | 4 | - | A    |

<sup>a</sup> Population location: QLD – Queensland; SA – South Australia

<sup>b</sup> Age determined by dentition and the degree of wear of the upper pre-molar (Martin *et al.* 1999)

<sup>c</sup> KoRV variants determined by KoRV transcripts; ALL = all published variants (A to I)

<sup>d</sup> N= no env hypervariable region detected.

603

604 **Table 3.** Summary information of total Nanopore reads matching to the koala reference  
605 genome

606

| Sample                      | Reads mapped to KoRV | Reads mapped to koala genome | Insertion Sites | Median (range) reads mapped per site |
|-----------------------------|----------------------|------------------------------|-----------------|--------------------------------------|
| Koala 1 – whole genome      | 156                  | 152                          | 14              | 10 (1 – 26)                          |
| Koala 1 – CRISPR enrichment | 2488                 | 272                          | 16              | 14.5 (1 – 47)                        |
| Koala 2                     | 275                  | 72                           | 3               | 13 (11 – 48)                         |
| Koala 3                     | 1512                 | 323                          | 18              | 10 (1 – 63)                          |
| Koala 4                     | 1699                 | 609                          | 25              | 5 (1 – 70)                           |
| Koala 5                     | 156                  | NA                           | NA              | NA                                   |
| Total                       | 6286                 | 1428                         | 56              | 8 (1 – 116)                          |

607 NA – Koala 5 nanopore reads generated using long-range PCR of KoRV primers, and did

608 not overlap the koala genome

609

610 **Table 4.** Summary of insertion sites in the koala reference genome (Genbank Accession number: GCA\_002099425.1) identified by  
611 mapping reads with minimap2

| Contig         | Reads mapped | K01-WG | K01-CR | K2 (08) | K3 (23) | K4 (31) | Comment on Insert Site                                                                                                                                    |
|----------------|--------------|--------|--------|---------|---------|---------|-----------------------------------------------------------------------------------------------------------------------------------------------------------|
| NW_018343952.1 | 48           | 0      | 0      | 48      | 0       | 0       | Insert within MAP2K5 gene                                                                                                                                 |
| NW_018343957.1 | 49           | 20     | 28     | 0       | 0       | 1       | Insert at different locations on contig between K1 and K4; K1 insert ~86 kb upstream of XR_002328485.1 Lnc RNA (potential interaction with VCAN gene)     |
| NW_018343959.1 | 47           | 0      | 0      | 0       | 0       | 47      | Insert within MPP4 gene                                                                                                                                   |
| NW_018343963.1 | 13           | 0      | 0      | 13      | 0       | 0       |                                                                                                                                                           |
| NW_018343964.1 | 50           | 20     | 30     | 0       | 0       | 0       | ~36 kb upstream of RAB3GAP2 gene                                                                                                                          |
| NW_018343968.1 | 116          | 21     | 47     | 0       | 48      | 0       | ~150 kb upstream of STX6 gene                                                                                                                             |
| NW_018343970.1 | 5            | 0      | 0      | 0       | 0       | 5       | ~60 kb upstream of LOC110207063 gene                                                                                                                      |
| NW_018343981.1 | 68           | 0      | 0      | 0       | 0       | 68      | Insert within LOC110209428 gene                                                                                                                           |
| NW_018343993.1 | 45           | 7      | 38     | 0       | 0       | 0       | ~18 kb upstream of LOC110211657 gene                                                                                                                      |
| NW_018343996.1 | 56           | 26     | 30     | 0       | 0       | 0       | ~7 kb upstream of LOC110212362 gene                                                                                                                       |
| NW_018343997.1 | 32           | 0      | 0      | 0       | 32      | 0       | ~113 kb upstream of COMMD6                                                                                                                                |
| NW_018344020.1 | 11           | 1      | 8      | 0       | 0       | 2       | ~789 kb gap between mapping of upstream and downstream regions                                                                                            |
| NW_018344030.1 | 58           | 0      | 0      | 0       | 0       | 58      | Insert within LOC110217408 gene                                                                                                                           |
| NW_018344035.1 | 54           | 0      | 0      | 0       | 0       | 54      | Insert within LOC110217834 LncRNA                                                                                                                         |
| NW_018344046.1 | 32           | 0      | 0      | 11      | 21      | 0       | Insert in CPA6 gene                                                                                                                                       |
| NW_018344081.1 | 91           | 20     | 34     | 0       | 37      | 0       | Insert within TSPAN5 gene                                                                                                                                 |
| NW_018344087.1 | 54           | 0      | 0      | 0       | 0       | 54      | ~18 kb upstream of BLOC1S6 gene                                                                                                                           |
| NW_018344090.1 | 40           | 19     | 21     | 0       | 0       | 0       |                                                                                                                                                           |
| NW_018344116.1 | 45           | 0      | 0      | 0       | 0       | 45      | ~1 kb upstream of LOC110193889 LncRNA                                                                                                                     |
| NW_018344144.1 | 49           | 0      | 0      | 0       | 0       | 49      | ~80 kb upstream of HOOK3                                                                                                                                  |
| NW_018344154.1 | 15           | 0      | 0      | 0       | 15      | 0       | Insert within PITPNM2 gene                                                                                                                                |
| NW_018344162.1 | 53           | 0      | 0      | 0       | 0       | 53      | ~60 kb upstream of TM4SF20 gene                                                                                                                           |
| NW_018344173.1 | 47           | 0      | 0      | 0       | 47      | 0       | ~17, 20, 21, & 22 kb, upstream of tRNA-GCC, tRNA-GUC, tRNA-CUC, and LOC110197942 gene (predicted to encode heat shock 70 kDa protein 6-like) respectively |
| NW_018344210.1 | 42           | 13     | 29     | 0       | 0       | 0       | ~134 kb upstream of CXXC4 gene                                                                                                                            |

bioRxiv preprint doi: <https://doi.org/10.1101/211466>; this version posted December 15, 2021. The copyright holder for this preprint (which was not certified by peer review) is the author/funder, who has granted bioRxiv a license to display the preprint in perpetuity. It is made available under aCC-BY-NC-ND 4.0 International license.

|                |      |     |     |    |     |     |                                                               |
|----------------|------|-----|-----|----|-----|-----|---------------------------------------------------------------|
| NW_018344261.1 | 63   | 0   | 0   | 0  | 63  | 0   | Insert in PPFIBP1 gene                                        |
| NW_018344304.1 | 58   | 0   | 0   | 0  | 0   | 58  | Insert within DCLK1 gene                                      |
| NW_018344424.1 | 50   | 0   | 0   | 0  | 21  | 29  | Insert sites ~7 kb apart in different koalas                  |
| NW_018344452.1 | 88   | 0   | 0   | 0  | 18  | 70  | ~18 kb gap between mapping of upstream and downstream regions |
| NW_018344703.1 | 6    | 0   | 0   | 0  | 5   | 1   | Small genome contig (~41 kb)                                  |
| NW_018345058.1 | 10   | 0   | 0   | 0  | 4   | 6   | Small genome contig (~31 kb)                                  |
| NW_018345540.1 | 5    | 0   | 0   | 0  | 5   | 0   | Small genome contig (~14 kb)                                  |
| <b>Totals</b>  | 1400 | 147 | 265 | 72 | 316 | 600 |                                                               |

612

613

614

615 **Supplementary Data**

616

617 **Supplementary Data 1:** Details of the animals included in this study: N/A = sample  
618 not available for testing, region of origin, QLD= Queensland, SA= South Australia, sex,  
619 M= Male, F= female, tooth wear class (age classification on a 7 point scale <sup>69</sup>), KoRV  
620 proviral status (pol gene PCR on DNA from whole blood), lymph node RNA quality and  
621 NGS read details: concentration, A260/280 and A260/230 ratios, RIN value, number of  
622 paired raw reads and number of trimmed reads from each sample.

623

624 **Supplementary Data 2:** Table of sequence location and naming of KoRV and RecKoRV  
625 sequences from the koala reference genome <sup>70</sup>

626

627 **Supplementary Data 3:** Fast file of sequences of KoRV and RecKoRV from the koala  
628 reference genome <sup>70</sup>

629

630 **Supplementary Data 4:** Estimated counts of KoRV envelope variants for individual  
631 animals, Column A = Sequence read archive (SRA) identifier, Column B = Koala ID as per  
632 Supplementary file 1, Column C, D, E: TPM for KoRV A, *gag*, *pro/pol* and *env* (Genbank  
633 number AF151794), Column F-M = KoRV envelope variant based on the first 575  
634 nucleotides of the envelope variants (B-I). Column N= State of origin, Column O= KoRV  
635 pol gene PCR on whole blood DNA.

636

637 **Supplementary Data 5:** Normalised expression Log<sub>10</sub>(estimated counts) of KoRV A  
638 complete *env* gene and the 575 nucleotides of the hypervariable region of the envelope  
639 variants (B-I) for animals from tooth wear (age) class 4. Box and whisker plots show the  
640 median and interquartile ranges (box) and minimum/maximum expression (whiskers) of  
641 groups. Data for individual animals within a group are shown by circles. QLD animals in

642 blue and SA animals in orange. Envelope variants with significantly different expression  
643 between QLD and SA groups marked with black bars (\*\* = P<0.001, \* = P<0.005 )

644

645 **Supplementary Data 6:** Sequence similarity alignment generated using EasyFig <sup>71</sup>.

646 Representative assemblies from each of Koala 1, Koala 3, and Koala 4 were compared  
647 using Blast, with regions with an identity of at least 75% between sequences connected  
648 and coloured by identity value. The location in the koala genome for each of the four  
649 assemblies is denoted by the koala reference genome contig accession number in the  
650 title for each sequence. Annotated fragments of sequence regions (PhER 5' and PhER 3')  
651 or incomplete genes (*gag*, *env*) are denoted with jagged lines at the 5' or 3' end of the  
652 annotation. K01 SA1 NW018344210 has a deletion seen in 50% of the assembled inserts  
653 further truncating the *gag* gene compared to the other representative ReCKoRV  
654 assemblies. This deletion ranged from ~400 – 500 bases, depending on the assembly.

655

656

657

## 658 References

- 659 1 Woinarski, J. & Burbidge, A. A. *Phascolarctos cinereus*. *The IUCN Red List of*  
660 *Threatened Species 2016* **e.T16892A21960344** (2016).
- 661 2 Committee, E. a. C. R. (ed Senate Committee) (Senate Printing Unit,  
662 Parliament House Canberra, 2011).
- 663 3 Polkinghorne, A., Hanger, J. & Timms, P. Recent advances in understanding the  
664 biology, epidemiology and control of chlamydial infections in koalas. *Vet Microbiol*  
665 **165**, 214-223, doi:10.1016/j.vetmic.2013.02.026 (2013).
- 666 4 Simmons, G. S. *et al.* Prevalence of koala retrovirus in geographically diverse  
667 populations in Australia. *Aust Vet J* **90**, 404-409, doi:10.1111/j.1751-  
668 0813.2012.00964.x (2012).
- 669 5 Neaves, L. E. *et al.* Phylogeography of the Koala, (*Phascolarctos cinereus*), and  
670 Harmonising Data to Inform Conservation. *PLoS One* **11**, e0162207,  
671 doi:10.1371/journal.pone.0162207 (2016).
- 672 6 Tarlinton, R. *et al.* Transcriptomic and Genomic Variants Between Koala  
673 Populations Reveals Underlying Genetic Components to Disorders in a  
674 Bottlenecked Population. *Conservation Genetics In Press*, 10.1007/s10592-  
675 10021-01340-10597 doi:10.1007/s10592-021-01340-7 (2021).
- 676 7 Robinson, A. C. in *The koala: proceedings of the Taronga symposium on koala*  
677 *biology, management and medicine*. 132-143 (Zoological Parks Board, Sydney ).
- 678 8 lindsay, H. A. Re-establishing the koala in SA. *Wild Life* **12**, 257-262 (1950).
- 679 9 Hayward, A., Grabherr, M. & Jern, P. Broad-scale phylogenomics provides insights  
680 into retrovirus-host evolution. *Proc Natl Acad Sci U S A* **110**, 20146-20151,  
681 doi:10.1073/pnas.1315419110 (2013).



- 682 10 Manghera, M. & Douville, R. N. Endogenous retrovirus-K promoter: a landing strip  
683 for inflammatory transcription factors? *Retrovirology* **10**, 16, doi:10.1186/1742-  
684 4690-10-16 (2013).
- 685 11 Chuong, E. B., Rumi, M. A., Soares, M. J. & Baker, J. C. Endogenous retroviruses  
686 function as species-specific enhancer elements in the placenta. *Nature genetics*  
687 **45**, 325-329, doi:10.1038/ng.2553 (2013).
- 688 12 Chen, C. P. *et al.* Functional Characterization of the Human Placental Fusogenic  
689 Membrane Protein Syncytin 2. *Biology of reproduction* **79**, 815-823 (2008).
- 690 13 Dupressoir, A. *et al.* Syncytin-A and syncytin-B, two fusogenic placenta-specific  
691 murine envelope genes of retroviral origin conserved in Muridae. *Proc Natl Acad*  
692 *Sci U S A* **102**, 725-730 (2005).
- 693 14 Grow, E. J. *et al.* Intrinsic retroviral reactivation in human preimplantation  
694 embryos and pluripotent cells. *Nature* **522**, 221-225, doi:10.1038/nature14308  
695 (2015).
- 696 15 Watanabe, S. *et al.* Phylogenetic and structural diversity in the feline leukemia  
697 virus env gene. *PLoS One* **8**, e61009, doi:10.1371/journal.pone.0061009 (2013).
- 698 16 Evans, L. H. *et al.* Mobilization of endogenous retroviruses in mice after infection  
699 with an exogenous retrovirus. *J Virol* **83**, 2429-2435 (2009).
- 700 17 Hanger, J. J., Bromham, L. D., McKee, J. J., O'Brien, T. M. & Robinson, W. F. The  
701 Nucleotide Sequence of Koala (*Phascolarctos cinereus*) Retrovirus: a Novel Type C  
702 Endogenous Virus Related to Gibbon Ape Leukemia Virus. *Journal of Virology* **74**,  
703 4264-4272 (2000).
- 704 18 Avila-Arcos, M. C. *et al.* One hundred twenty years of koala retrovirus evolution  
705 determined from museum skins. *Mol Biol Evol* **30**, 299-304,  
706 doi:10.1093/molbev/mss223 (2013).
- 707 19 Simmons, G., Clarke, D., McKee, J., Young, P. & Meers, J. Discovery of a novel  
708 retrovirus sequence in an Australian native rodent (*Melomys burtoni*): a putative  
709 link between gibbon ape leukemia virus and koala retrovirus. *PLoS One* **9**,  
710 e106954, doi:10.1371/journal.pone.0106954 (2014).
- 711 20 Alfano, N. *et al.* Endogenous Gibbon Ape Leukemia Virus Identified in a Rodent  
712 (*Melomys burtoni* subsp.) from Wallacea (Indonesia). *J Virol* **90**, 8169-8180,  
713 doi:10.1128/jvi.00723-16 (2016).
- 714 21 Brown, K. & Tarlinton, R. Is Gibbon Ape Leukaemia Virus still a threat? . *Mammal*  
715 *Review* **47**, 53-61 (2017).
- 716 22 Hayward, J. A. *et al.* Infectious KoRV-related retroviruses circulating in Australian  
717 bats. *Proc Natl Acad Sci U S A* **117**, 9529-9536, doi:10.1073/pnas.1915400117  
718 (2020).
- 719 23 McMichael, L. *et al.* A novel Australian flying-fox retrovirus shares an evolutionary  
720 ancestor with Koala, Gibbon and *Melomys* gamma-retroviruses. *Virus genes* **55**,  
721 421-424, doi:10.1007/s11262-019-01653-3 (2019).
- 722 24 Tarlinton, R. E., Meers, J. & Young, P. R. Retroviral invasion of the koala genome.  
723 *Nature* **442**, 79-81, doi:10.1038/nature04841 (2006).
- 724 25 Sarker, N. *et al.* Koala retrovirus viral load and disease burden in distinct  
725 northern and southern koala populations. *Scientific reports* **10**, 263,  
726 doi:10.1038/s41598-019-56546-0 (2020).
- 727 26 Maher, I. E. & Higgins, D. P. Altered Immune Cytokine Expression Associated with  
728 KoRV B Infection and Season in Captive Koalas. *PLoS One* **11**, e0163780,  
729 doi:10.1371/journal.pone.0163780 (2016).
- 730 27 McEwan, G. *et al.* Retroviral integrations contribute to elevated host cancer rates  
731 during germline invasion. *Nature communications In Press* (2021).
- 732 28 Quigley, B. L. *et al.* Changes in endogenous and exogenous Koala Retrovirus  
733 (KoRV) subtype expression over time reflects koala health outcomes. *J Virol*,  
734 doi:10.1128/jvi.00849-19 (2019).
- 735 29 Waugh, C. A. *et al.* Infection with koala retrovirus subgroup B (KoRV-B), but not  
736 KoRV-A, is associated with chlamydial disease in free-ranging koalas  
737 (*Phascolarctos cinereus*). *Scientific reports* **7**, 134, doi:10.1038/s41598-017-  
738 00137-4 (2017).

- 739 30 Legione, A. R. *et al.* Koala retrovirus (KoRV) genotyping analyses reveal a low  
740 prevalence of KoRV-A in Victorian koalas and an association with clinical disease.  
741 *Journal of medical microbiology*, doi:10.1099/jmm.0.000416 (2016).
- 742 31 Tarlinton, R., Meers, J., Hanger, J. & Young, P. Real-time reverse transcriptase  
743 PCR for the endogenous koala retrovirus reveals an association between plasma  
744 viral load and neoplastic disease in koalas. *Journal of General Virology* **86**, 783-  
745 787, doi:10.1099/vir.0.80547-0 (2005).
- 746 32 Fabijan, J. *et al.* Prevalence and clinical significance of koala retrovirus in two  
747 South Australian koala (*Phascolarctos cinereus*) populations. *Journal of medical*  
748 *microbiology* **68**, 1072-1080, doi:10.1099/jmm.0.001009 (2019).
- 749 33 Quigley, B. L. *et al.* Koala Retrovirus in Northern Australia Shows a Mixture of  
750 Stable Endogenization and Exogenous Lineage Diversification within Fragmented  
751 Koala Populations. *J Virol*, doi:10.1128/jvi.02084-20 (2021).
- 752 34 Chappell, K. J. *et al.* Phylogenetic diversity of Koala Retrovirus within a Wild Koala  
753 Population. *J Virol*, doi:10.1128/jvi.01820-16 (2016).
- 754 35 Cui, P. *et al.* Comprehensive profiling of retroviral integration sites using target  
755 enrichment methods from historical koala samples without an assembled  
756 reference genome. *PeerJ* **4**, e1847, doi:10.7717/peerj.1847 (2016).
- 757 36 Sarker, N. *et al.* Genetic diversity of Koala retrovirus env gene subtypes: insights  
758 into northern and southern koala populations. *J Gen Virol* **100**, 1328-1339,  
759 doi:10.1099/jgv.0.001304 (2019).
- 760 37 Sarker, N. *et al.* Koala retrovirus viral load and disease burden in distinct  
761 northern and southern koala populations. *Scientific reports* **In press** (2019).
- 762 38 Hobbs, M. *et al.* Long-read genome sequence assembly provides insight into  
763 ongoing retroviral invasion of the koala germline. *Scientific reports* **7**, 15838,  
764 doi:10.1038/s41598-017-16171-1 (2017).
- 765 39 Quigley, B. L., Wedrowicz, F., Hogan, F. & Timms, P. Phylogenetic and  
766 geographical analysis of a retrovirus during the early stages of endogenous  
767 adaptation and exogenous spread in a new host. *Molecular ecology*,  
768 doi:10.1111/mec.15735 (2020).
- 769 40 Xu, W. *et al.* An exogenous retrovirus isolated from koalas with malignant  
770 neoplasias in a US zoo. *Proc Natl Acad Sci U S A* **110**, 11547-11552,  
771 doi:10.1073/pnas.1304704110 (2013).
- 772 41 Quigley, B. L., Ong, V. A., Hanger, J. & Timms, P. Molecular Dynamics and Mode  
773 of Transmission of Koala Retrovirus as It Invades and Spreads through a Wild  
774 Queensland Koala Population. *J Virol* **92**, doi:10.1128/jvi.01871-17 (2018).
- 775 42 Zheng, H. *et al.* Koala retrovirus diversity, transmissibility, and disease  
776 associations. *Retrovirology* **17**, 34, doi:10.1186/s12977-020-00541-1 (2020).
- 777 43 Hashem, M. A. *et al.* Transmission of Koala Retrovirus from Parent Koalas to a  
778 Joey in a Japanese Zoo. *J Virol* **94**, doi:10.1128/jvi.00019-20 (2020).
- 779 44 Xu, W., Gorman, K., Santiago, J. C., Kluska, K. & Eiden, M. V. Genetic diversity of  
780 koala retroviral envelopes. *Viruses* **7**, 1258-1270, doi:10.3390/v7031258 (2015).
- 781 45 Shimode, S., Nakagawa, S., Yoshikawa, R., Shojima, T. & Miyazawa, T.  
782 Heterogeneity of koala retrovirus isolates. *FEBS letters* **588**, 41-46,  
783 doi:10.1016/j.febslet.2013.10.046 (2014).
- 784 46 Xu, W. & Eiden, M. V. Koala Retroviruses: Evolution and Disease Dynamics.  
785 *Annual review of virology* **2**, 119-134, doi:10.1146/annurev-virology-100114-  
786 055056 (2015).
- 787 47 Shojima, T. *et al.* Identification of a novel subgroup of Koala retrovirus from  
788 Koalas in Japanese zoos. *J Virol* **87**, 9943-9948, doi:10.1128/jvi.01385-13  
789 (2013).
- 790 48 Yu, T. *et al.* The piRNA Response to Retroviral Invasion of the Koala Genome. *Cell*  
791 **179**, 632-643.e612, doi:10.1016/j.cell.2019.09.002 (2019).
- 792 49 Lober, U. *et al.* Degradation and remobilization of endogenous retroviruses by  
793 recombination during the earliest stages of a germ-line invasion. *Proc Natl Acad*  
794 *Sci U S A* **115**, 8609-8614, doi:10.1073/pnas.1807598115 (2018).

- 795 50 Martin, R. & Handasyde, K. *The koala: Natural history, conservation and*  
796 *management*. (University of New South Wales Press, Sydney, 1999).
- 797 51 Tarlinton, R., Meers, J., Hanger, J. & Young, P. Real-time reverse transcriptase  
798 PCR for the endogenous koala retrovirus reveals an association between plasma  
799 viral load and neoplastic disease in koalas. *Journal of General Virology* **86**, 783-  
800 787 (2005).
- 801 52 Li, H. Minimap2: pairwise alignment for nucleotide sequences. *Bioinformatics* **34**,  
802 3094-3100, doi:10.1093/bioinformatics/bty191 (2018).
- 803 53 Li, H. *et al.* The Sequence alignment/map (SAM) format and SAMtools.,  
804 *Bioinformatics* **25**, 2078-2079 (2009).
- 805 54 Hobbs, M. *et al.* A transcriptome resource for the koala (*Phascolarctos cinereus*):  
806 insights into koala retrovirus transcription and sequence diversity. *BMC genomics*  
807 **15**, 786, doi:10.1186/1471-2164-15-786 (2014).
- 808 55 Kolmogorov, M., Yuan, J., Lin, Y. & Pevzner, P. A. Assembly of long, error-prone  
809 reads using repeat graphs. *Nature biotechnology* **37**, 540-546,  
810 doi:10.1038/s41587-019-0072-8 (2019).
- 811 56 Kim, D., Langmead, B. & Salzberg, S. L. HISAT: a fast spliced aligner with low  
812 memory requirements. *Nature methods* **12**, 357-360, doi:10.1038/nmeth.3317  
813 (2015).
- 814 57 Bray, N. L., Pimentel, H., Melsted, P. & Pachter, L. Near-optimal probabilistic  
815 RNA-seq quantification. *Nature biotechnology* **34**, 525-527,  
816 doi:10.1038/nbt.3519 (2016).
- 817 58 Fabijan, J. *et al.* Pathological Findings in Koala Retrovirus-positive Koalas  
818 (*Phascolarctos cinereus*) from Northern and Southern Australia. *J Comp Pathol*  
819 **176**, 50-66, doi:10.1016/j.jcpa.2020.02.003 (2020).
- 820 59 Shojima, T. *et al.* Construction and characterization of an infectious molecular  
821 clone of Koala retrovirus. *J Virol* **87**, 5081-5088, doi:10.1128/jvi.01584-12  
822 (2013).
- 823 60 Magiorkinis, G., Gifford, R. J., Katzourakis, A., De Ranter, J. & Belshaw, R. Env-  
824 less endogenous retroviruses are genomic superspreaders. *Proc Natl Acad Sci U S*  
825 *A* **109**, 7385-7390, doi:10.1073/pnas.1200913109 (2012).
- 826 61 Rubin, H. The early history of tumor virology: Rous, RIF, and RAV. *Proc Natl Acad*  
827 *Sci U S A* **108**, 14389-14396, doi:10.1073/pnas.1108655108 (2011).
- 828 62 Nethe, M., Berkhout, B. & van der Kuyl, A. C. Retroviral superinfection resistance.  
829 *Retrovirology* **2**, 52, doi:10.1186/1742-4690-2-52 (2005).
- 830 63 Spencer, T. E., Mura, M., Gray, C. A., Griebel, P. J. & Palmarini, M. Receptor  
831 usage and fetal expression of ovine endogenous betaretroviruses: implications for  
832 coevolution of endogenous and exogenous retroviruses. *J Virol* **77**, 749-753  
833 (2003).
- 834 64 van der Kuyl, A. C. HIV infection and HERV expression: a review. *Retrovirology* **9**,  
835 6, doi:10.1186/1742-4690-9-6 (2012).
- 836 65 Olagoke, O. *et al.* Induction of neutralizing antibody response against koala  
837 retrovirus (KoRV) and reduction in viral load in koalas following vaccination with  
838 recombinant KoRV envelope protein. *NPJ vaccines* **3**, 30, doi:10.1038/s41541-  
839 018-0066-4 (2018).
- 840 66 Olagoke, O., Quigley, B. L., Hemmatzadeh, F., Tzipori, G. & Timms, P.  
841 Therapeutic vaccination of koalas harbouring endogenous koala retrovirus (KoRV)  
842 improves antibody responses and reduces circulating viral load. *NPJ vaccines* **5**,  
843 60, doi:10.1038/s41541-020-0210-9 (2020).
- 844 67 Fabijan, J. *et al.* Chlamydia pecorum prevalence in South Australian koala  
845 (*Phascolarctos cinereus*) populations: Identification and modelling of a population  
846 free from infection. *Scientific reports* **9**, 6261, doi:10.1038/s41598-019-42702-z  
847 (2019).
- 848 68 Speight, K. N. *et al.* Plasma biochemistry and urinalysis variables of koalas  
849 (*Phascolarctos cinereus*) with and without oxalate nephrosis. *Veterinary clinical*  
850 *pathology* **43**, 244-254, doi:10.1111/vcp.12145 (2014).

- 851 69 Martin, R. W. Age-specific fertility in three populations of the koala, *Phascolarctos*  
852 *cinereus* Goldfuss, in Victoria. . *Australian Wildlife Research* **8**, 275-283 (1981).  
853 70 Johnson, R. N. *et al.* Adaptation and conservation insights from the koala  
854 genome. *Nature genetics* **50**, 1102-1111, doi:10.1038/s41588-018-0153-5  
855 (2018).  
856 71 Sullivan, M. J., Petty, N. K. & Beatson, S. A. Easyfig: a genome comparison  
857 visualizer. *Bioinformatics* **27**, 1009-1010, doi:10.1093/bioinformatics/btr039  
858 (2011).  
859
